# Supplementary material
Source: Springer Nature journal article supplement (https://www.springerprofessional.de/resource/supplementary/13174_2013_4_MOESM6_ESM.pdf/10784748)

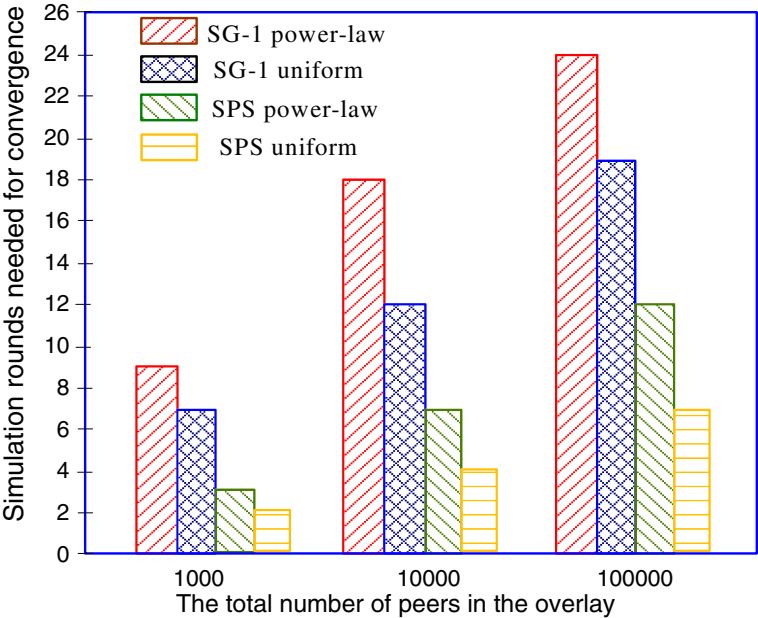

Supplement: MOESM6 [file 10784748]
